# Supplementary material for: Tumor-infiltrating mucosal-associated invariant T (MAIT) cells retain expression of cytotoxic effector molecules
Source: PubMed Central journal article supplement (PMC6497460; doi:10.18632/oncotarget.26866), 2019-04-19
Supplement: oncotarget-10-2810-s001.pdf [file oncotarget-10-2810-s001.pdf]

## Tumor-infiltrating mucosal-associated invariant T (MAIT) cells retain expression of cytotoxic effector molecules

### SUPPLEMENTARY MATERIALS

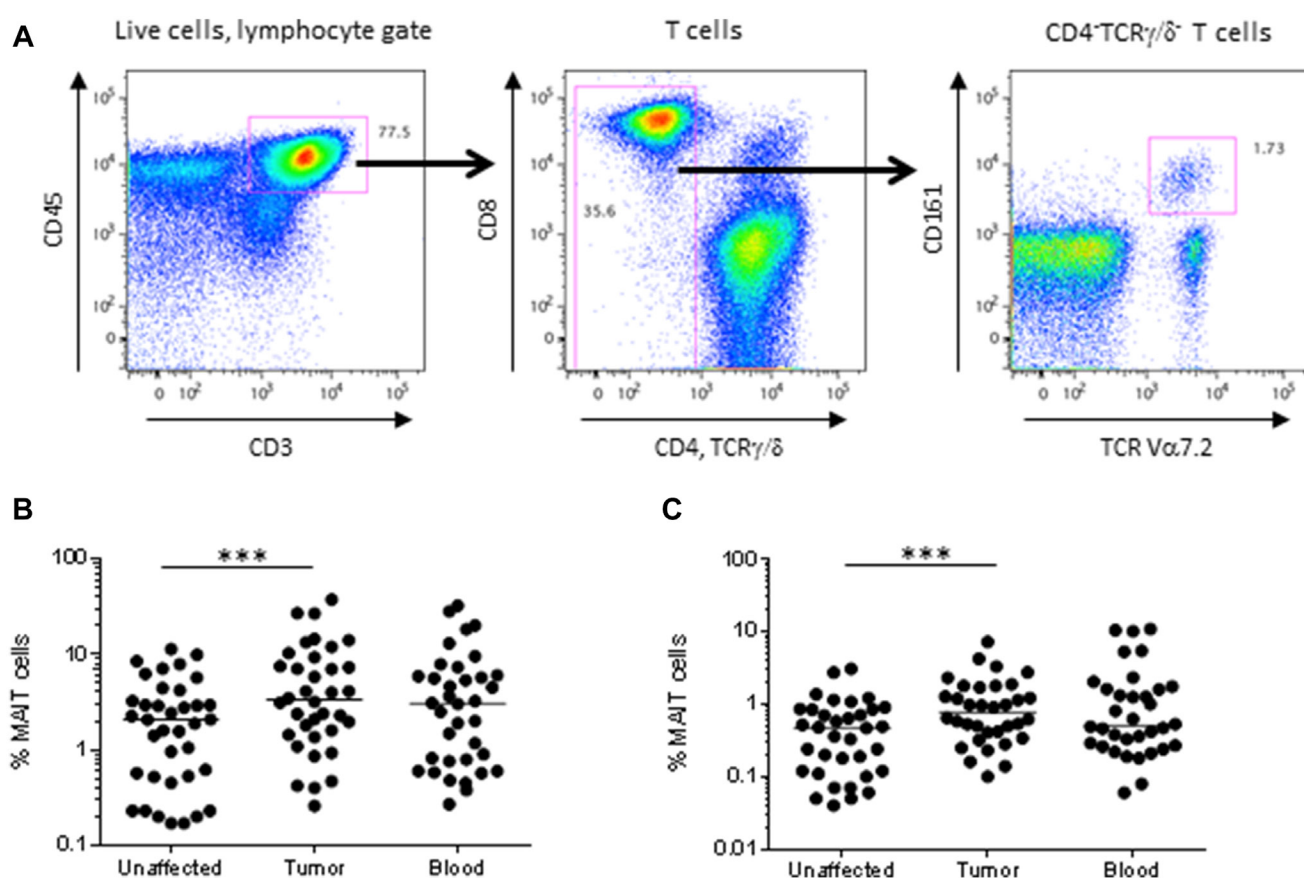

**Supplementary Figure 1: Gating strategy to identify MAIT cells.** (A) Dot plot shows one example of MAIT cell gating using a single cell suspension from a tumor. Live cells from a lymphocyte gate were further gated as CD45<sup>+</sup>CD3<sup>+</sup>T cells, and then CD8<sup>+</sup> and double negative T cells were used to determine the frequency of Va7.2<sup>+</sup>CD161<sup>high</sup> MAIT cells. (B) Frequencies of MAIT cells among CD8<sup>+</sup> and double negative T cells and (C) among all CD3<sup>+</sup>T cells isolated from unaffected colon, tumor tissue and peripheral blood. Symbols represent individual values and the line the median \*\*\**P* < 0.001, *n* = 35.

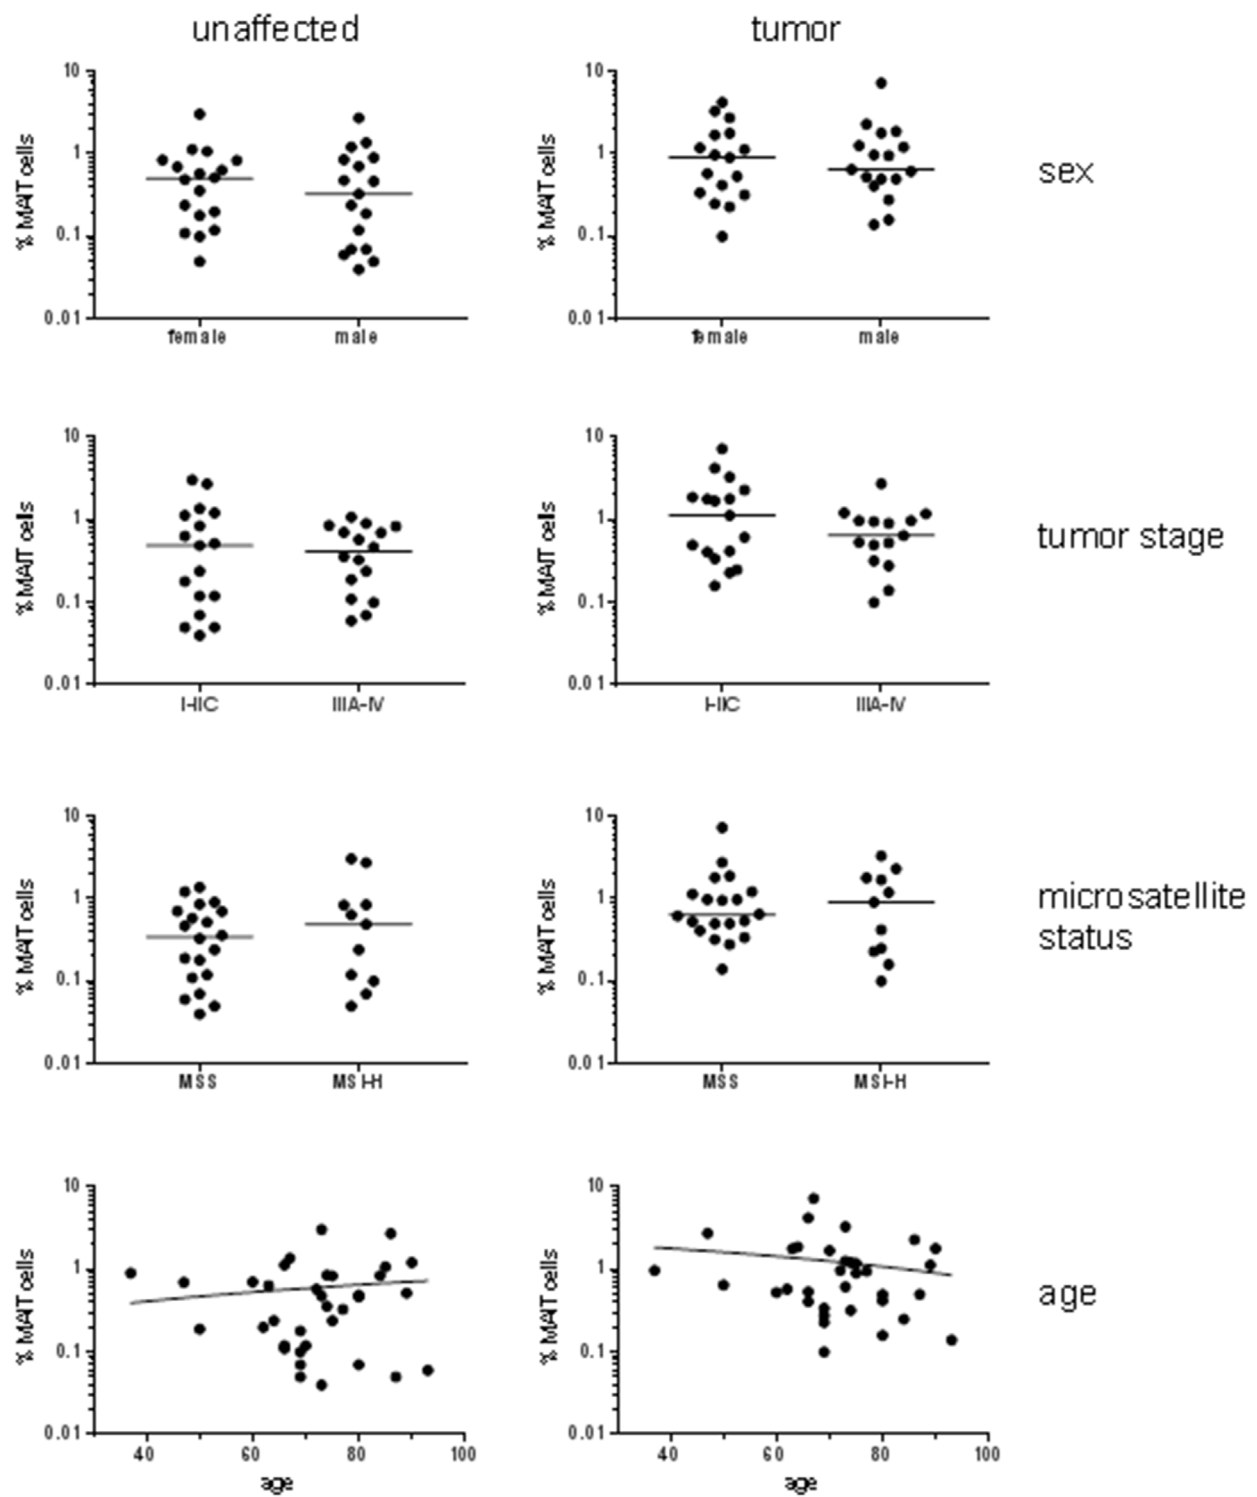

**Supplementary Figure 2: MAIT cell frequencies in relation to sex, tumor stage, microsatellite instability and age.** Single cell suspensions were prepared from unaffected colon tissue and tumors from the same patients, and the frequencies of MAIT cells in relation to all CD3<sup>+</sup> cells determined by flow cytometry. The other variables were retrieved from the pathology report  $n = 35$ .

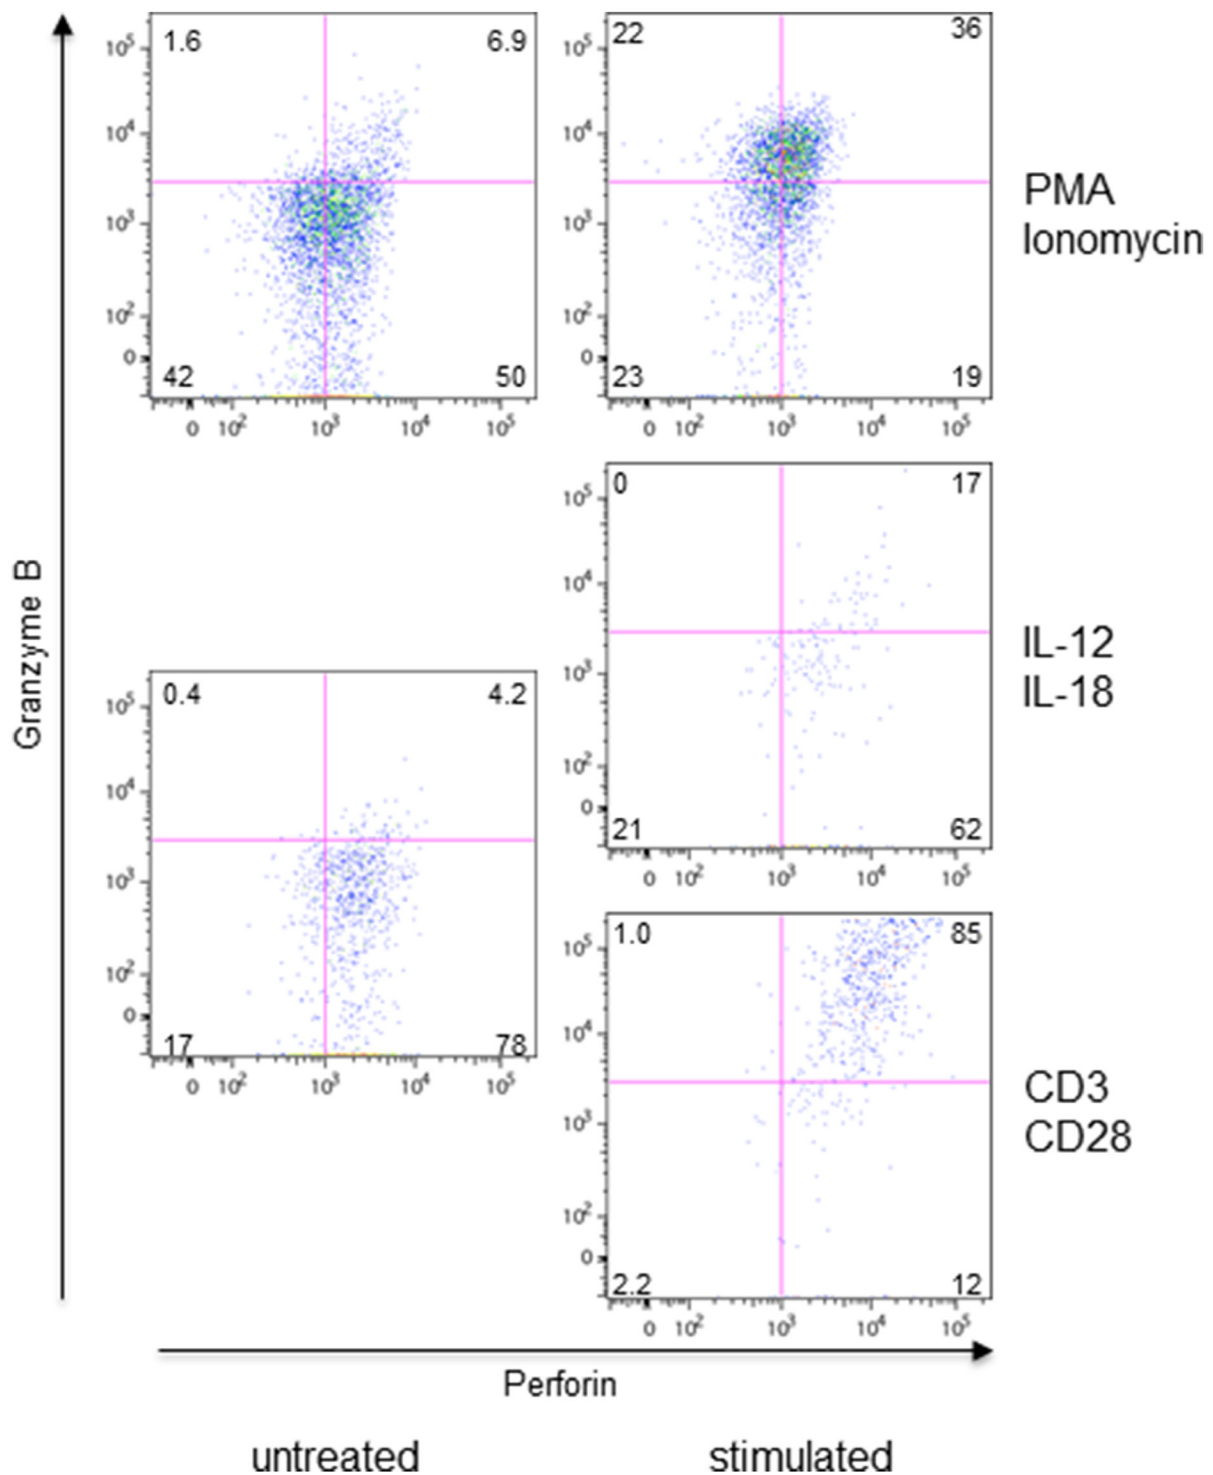

**Supplementary Figure 3: Representative FACS plots showing Granzyme B and Perforin staining in MAIT cells from colon tumors.** Single cell suspensions were isolated from colon tumors, and stimulated with PMA and Ionomycin, IL-12 and IL-18, or anti-CD3 and anti-CD28. MAIT cells were gated as in supplementary Figure 1, and expression of GrB and Perforin was examined by flow cytometry in untreated and stimulated cells.

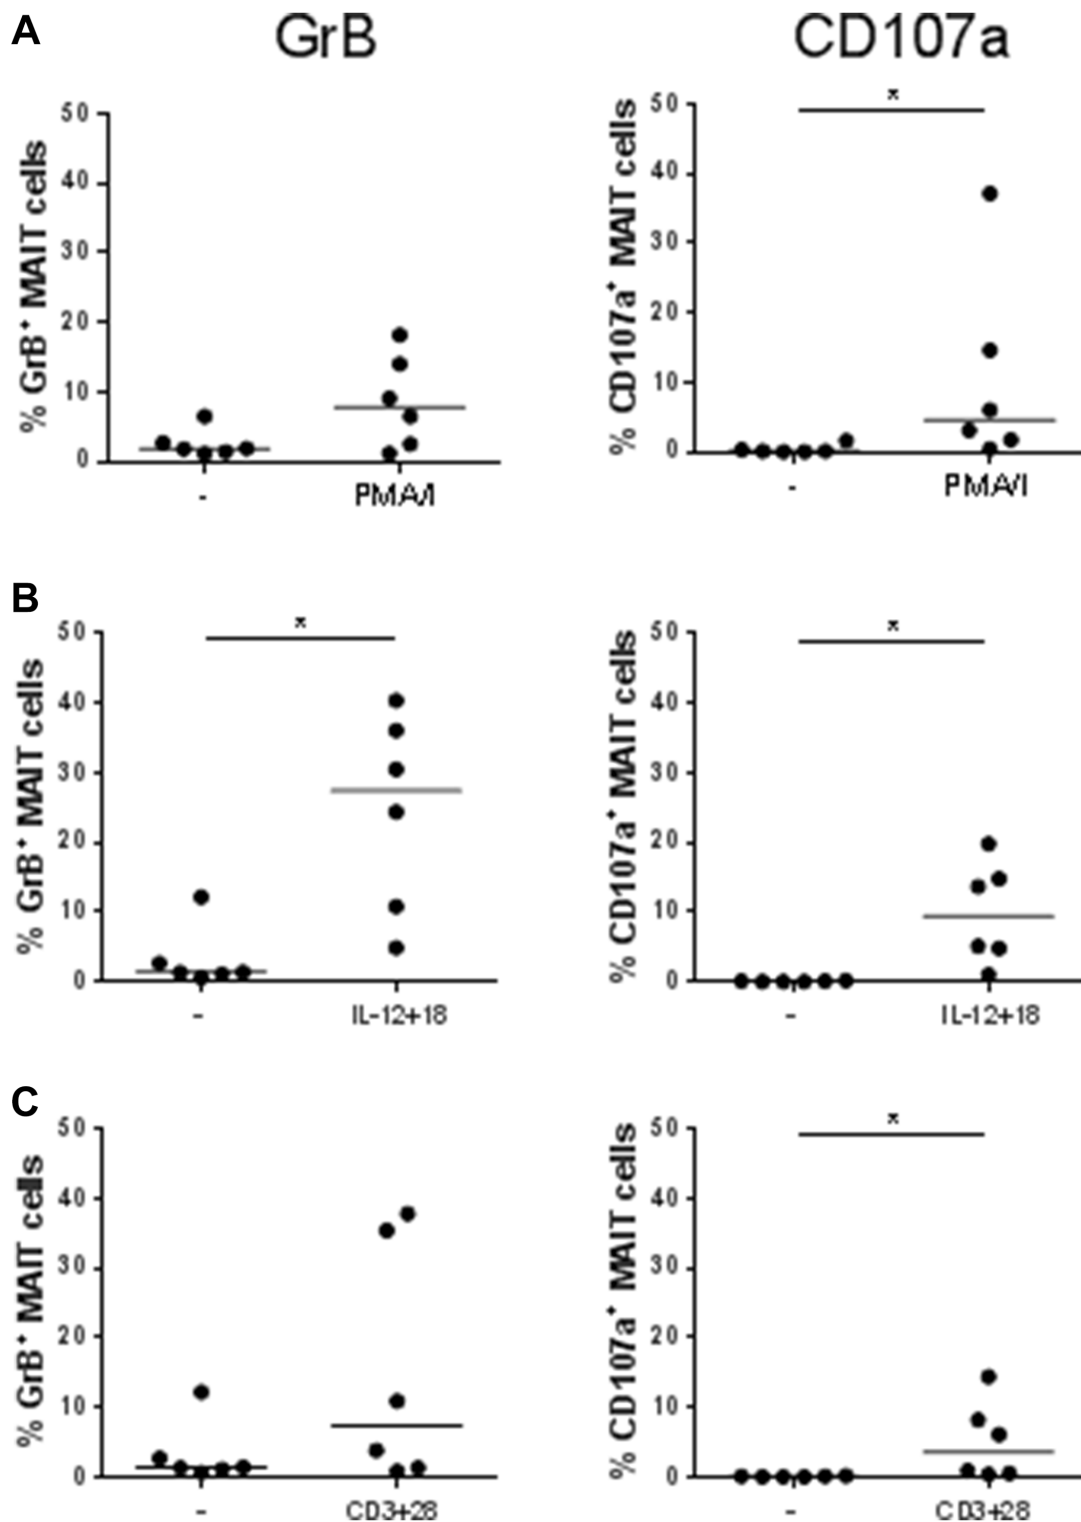

**Supplementary Figure 4: Frequencies of GrB<sup>+</sup> and CD107a<sup>+</sup> circulating MAIT cells from healthy volunteers.** Single cell suspensions were isolated from peripheral blood from healthy volunteers and stimulated with (A) PMA and Ionomycin, (B) IL-12 and IL-18, or (C) anti-CD3 and anti-CD28. Expression of GrB and CD107a was examined by flow cytometry. Symbols represent individual values and the line the median.  $n = 6$  \* $p < 0.05$ .

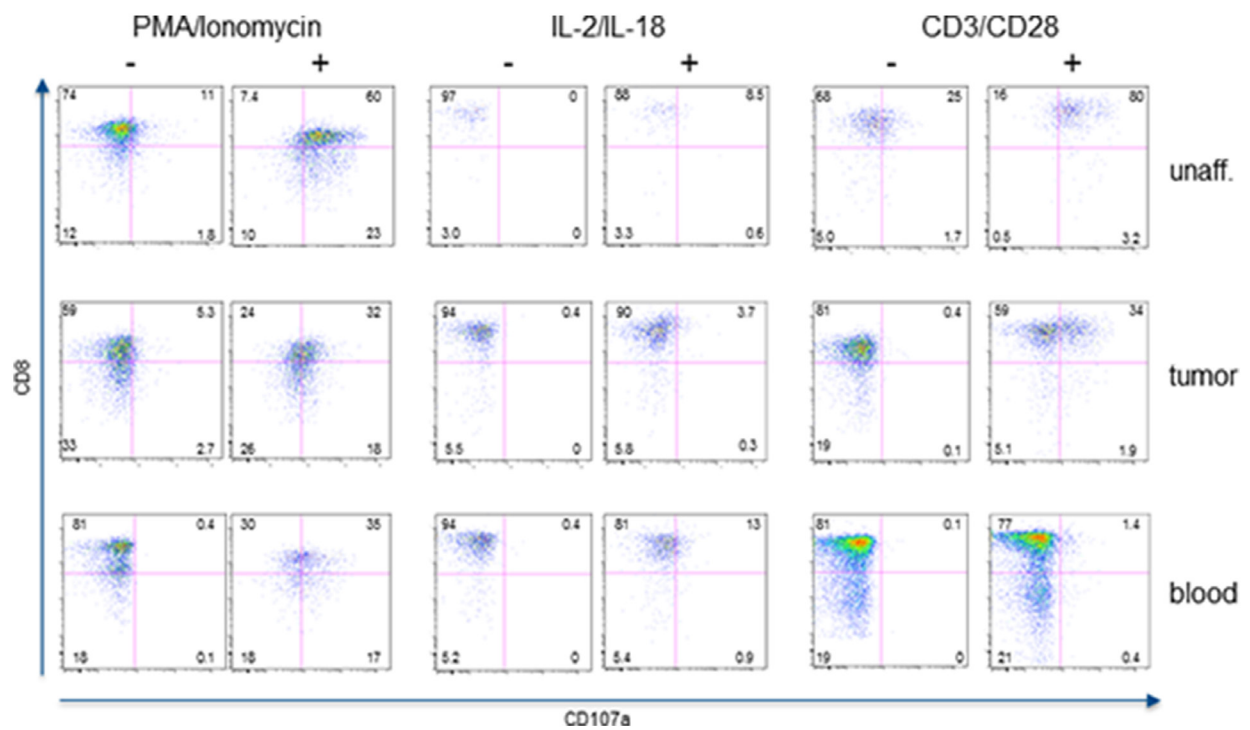

**Supplementary Figure 5: Degranulation of MAIT cells after stimulation.** Single cell suspensions were isolated from unaffected colon, colon tumors and peripheral blood, and stimulated with PMA and Ionomycin, IL-12 and IL-18, or anti-CD3 and anti-CD28. Expression of CD107a was examined by flow cytometry.

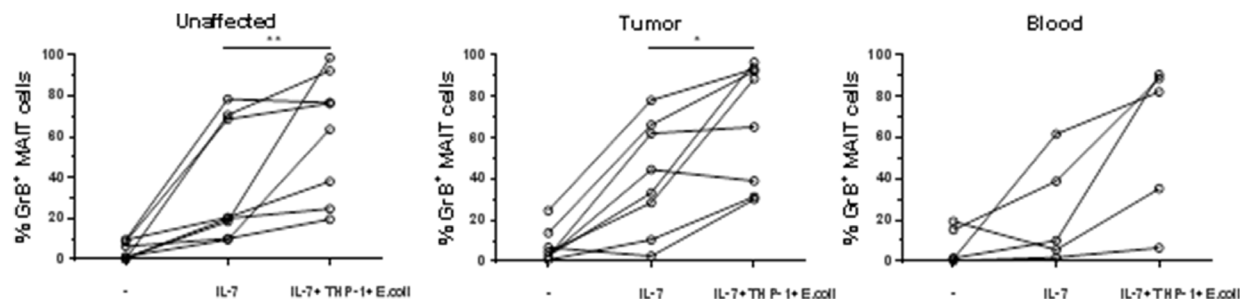

**Supplementary Figure 6: Frequencies of GrB<sup>+</sup> MAIT cells after antigen stimulation.** Single cell suspensions were isolated from unaffected colon, colon tumors and peripheral blood, and pre-incubated with IL-7 for 48 hours. They were then either left in IL-7 alone or co-cultured with THP-1 cells pre-incubated with fixed E. coli for 4 hours. Expression of GrB was examined by flow cytometry. Symbols represent individual values.  $n = 5-8$  \* $p < 0.05$ , \*\* $p < 0.01$ .

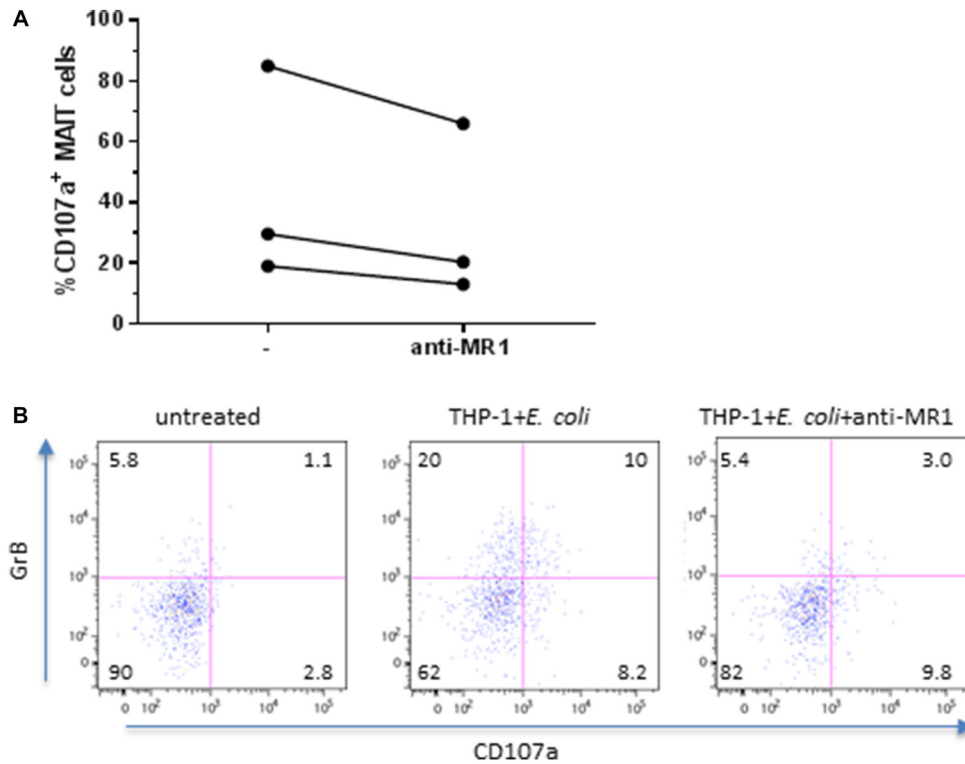

**Supplementary Figure 7: Degranulation of MAIT cells in the presence of antibodies to MR1.** Single cell suspensions were isolated from colon tumors and pre-incubated with IL-7 for 48 hours. They were then stimulated for 18 hours with THP-1 cells pre-incubated with fixed *E. coli* in the presence or absence of 10 mg/ml of monoclonal antibody to MR1. Expression of CD107a on MAIT cells was examined by flow cytometry. Symbols represent individual values from 3 different donors (A), and dot plots (B) show representative staining of MAIT cells isolated from a colon tumor and left unstimulated, or stimulated in the absence or presence of anti-MR1.

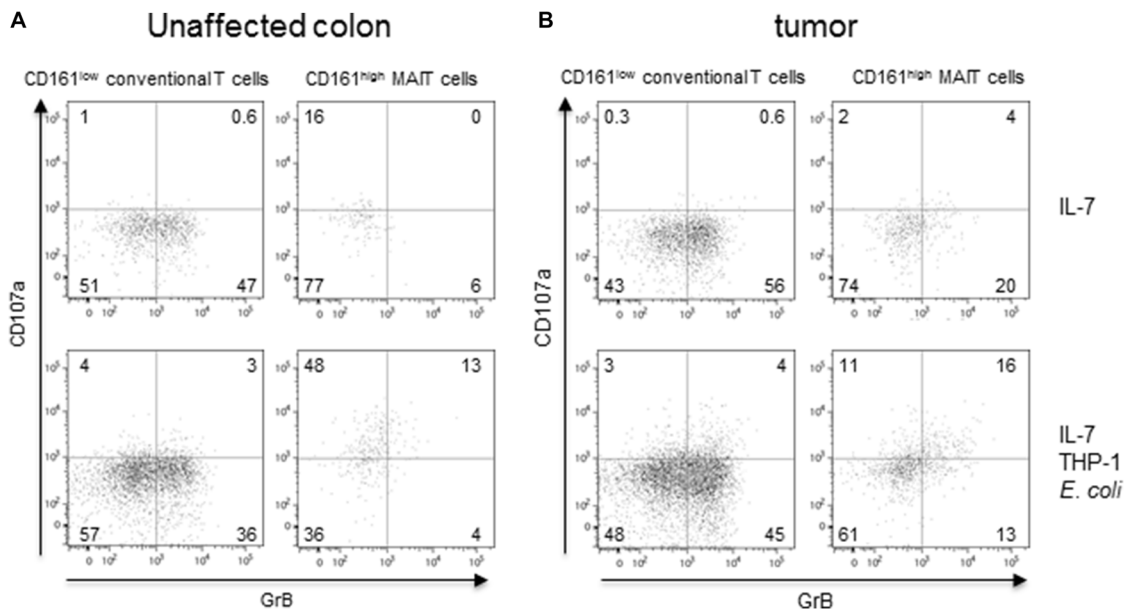

**Supplementary Figure 8: Degranulation by isolated colonic MAIT cells.** CD8<sup>+</sup> T cells were isolated by negative magnetic bead separation of single cell suspensions from unaffected colon and colon tumors, and incubated with IL-7 for 40 hours. Va7.2<sup>+</sup> cells were then isolated by positive magnetic bead separation and co-cultured with THP-1 cells, which had previously been pre-incubated with fixed *E. coli* for four hours. Expression of GrB and CD107a on Va7.2<sup>+</sup>CD161<sup>high</sup> and Va7.2<sup>+</sup>CD161<sup>low</sup> T cells isolated from (A) unaffected colon and (B) tumor tissue was determined by flow cytometry in cells only pre-incubated with IL-7 or co-cultured with *E. coli*-loaded THP-1 cells. One representative experiment out of three is shown.

**Supplementary Table 1: Characteristics of the colon cancer patients included in the study**

|                          |            | females | males |
|--------------------------|------------|---------|-------|
|                          | n          | 19      | 16    |
|                          | age        | 47–92   | 37–93 |
| Tumor location           | ascending  | 10      | 11    |
|                          | transverse | 5       | 2     |
|                          | descending | 4       | 3     |
| TNM stage                | I          | 4       | 4     |
|                          | IIA        | 5       | 4     |
|                          | IIB        | 1       | -     |
|                          | IIC        | -       | -     |
|                          | IIIA       | -       | -     |
|                          | IIIB       | 5       | 5     |
|                          | IIIC       | 4       | 3     |
|                          | IV         | -       | -     |
| Microsatellite stability | MSS        | 8       | 14    |
|                          | MSI-H      | 9       | 2     |
|                          | unknown    | 2       | -     |
